# Supplementary material
Source: Elsevier journal article supplement (https://www.sciencedirect.com/science/article/pii/S2254887421001508)
Supplement: mmc1 [file S2254887421001508:mmc1.pdf]

## APPENDIX A

**Table 1.S.** Beta-coefficients for different risk factors in the typical 10-year CVD-risk model, and after using age as a time-scale variable.

|                            | Men                   |                   | Women                 |                   |
|----------------------------|-----------------------|-------------------|-----------------------|-------------------|
|                            | Typical 10-year model | Age as time-scale | Typical 10-year model | Age as time-scale |
| Smoking                    | 1.20                  | 1.13              | 1.88*                 | 1.37              |
| Diabetes                   | 1.37*                 | 1.48*             | 1.28                  | 1.34*             |
| SBP (mmHg)                 |                       |                   |                       |                   |
| 140-149                    | 1.10                  | 1.11              | 1.01                  | 1.02              |
| 150-159                    | 1.10                  | 1.11              | 0.87                  | 0.90              |
| ≥160                       | 1.28                  | 1.25              | 0.82                  | 0.82              |
| Total cholesterol (mg/dL)  |                       |                   |                       |                   |
| 160-199                    | 1.19                  | 1.21              | 0.79                  | 0.77              |
| 200-239                    | 1.13                  | 1.32              | 0.73                  | 0.77              |
| ≥240                       | 0.83                  | 1.07              | 0.71                  | 0.79              |
| Antihypertensive treatment | 1.34                  | 1.34              | 1.13                  | 1.16              |

\*Statistically significant ( $p < .05$ ).

SBP: Systolic Blood Pressure.

### Calibration and discrimination analysis:

We follow the same premises as those used by D'Agostino-Nam in adapting the Homer-Lemeshow goodness-of-fit statistic. A statistic applied to competitive risk models was developed, and its associated probability was calculated. Instead of using the Kaplan-Meier method to estimate the mean of observed events, the Nelson-Aalen estimate is used, which takes competitive events into account. (Gerds T.A., Andersen P.K., and Kattan M.W. Calibration plots for risk prediction models in the presence of competing risks. *Statist. Med* 2014; 33: 3191–3203. doi:10.1002/sim.6152).

**Fig 1.S.** Calibration analysis in men.

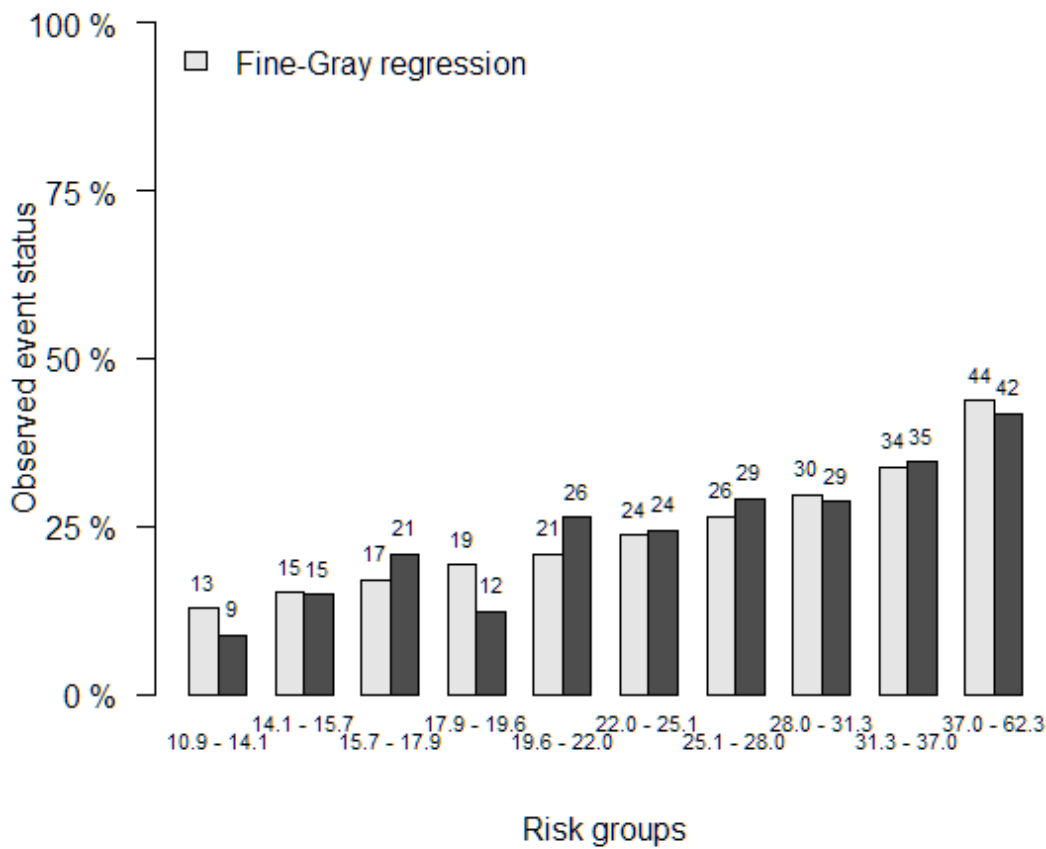

**Discrimination analysis in men**

Estimated C-index in % at time=10

AppCindex BootCvCindex  
FGR 62.9 59.8

AppCindex: Apparent (training data) performance SAMPLE  
BootCvCindex: Bootstrap crossvalidated performance RESULT BOOSTRAP

**Fig 2.S.** Calibration analysis in women.

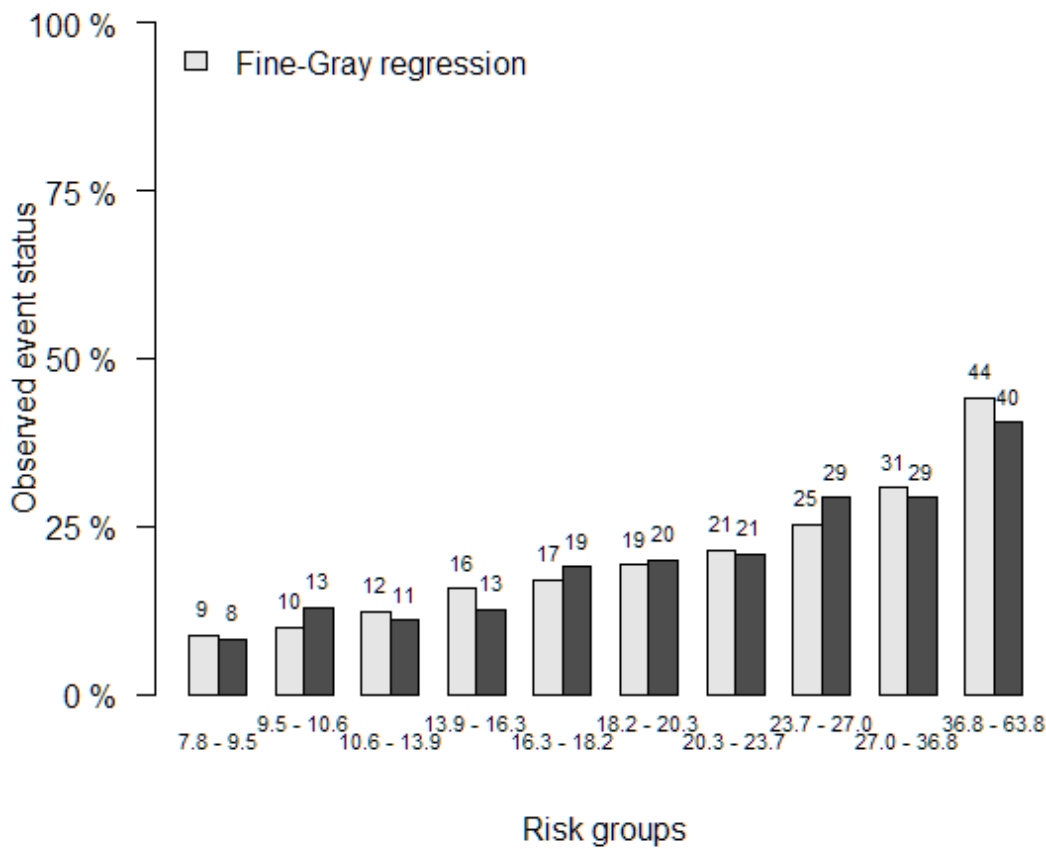

**Discrimination analysis in women**

Estimated C-index in % at time=10

|     | AppCindex | BootCvCindex |
|-----|-----------|--------------|
| FGR | 65.9      | 64.6         |

AppCindex: Apparent (training data) performance  
BootCvCindex: Bootstrap crossvalidated performance

AppCindex: Apparent (training data) performance SAMPLE  
BootCvCindex: Bootstrap crossvalidated performance RESULT BOOSTRAP

**Table 2.S.** Comparison of ten-year mean cardiovascular risk in older persons based on the SCORE-OP charts and EPICARDIAN-Score, by sex.

|       | <b>SCORE-OP</b>                | <b>EPICARDIAN</b>              | <b><i>p</i>*</b> |
|-------|--------------------------------|--------------------------------|------------------|
|       | Mean±SD [95%CI] (n)            | Mean±SD [95%CI] (n)            |                  |
| Men   | 24.6±19.75 [23.6-25.7] n=1,361 | 31.7±13.91 [30.9-32.4] n=1,462 | <.0001           |
| Women | 15.8±17.86 [15.0-16.6] n=1,800 | 26.0±15.25 [25.4-26.7] n=2,012 | <.0001           |

\*t- test for two independent samples.

CI: confidence interval; SD: standard deviation.
